# Supplementary material for: Structural Elucidation of Intact Rough-Type Lipopolysaccharides using Field Asymmetric Ion Mobility Spectrometry and Kendrick Mass Defect Plots
Source: PubMed Central journal article supplement — bioRxiv. 2023 Jul 5:2023.06.21.545950. Preprint. [Version 2] doi: 10.1101/2023.06.21.545950 (PMC10349945; doi:10.1101/2023.06.21.545950), 2023-07-05
Supplement: media-1.pdf [file media-1.pdf]

## Supplementary Figures and Tables

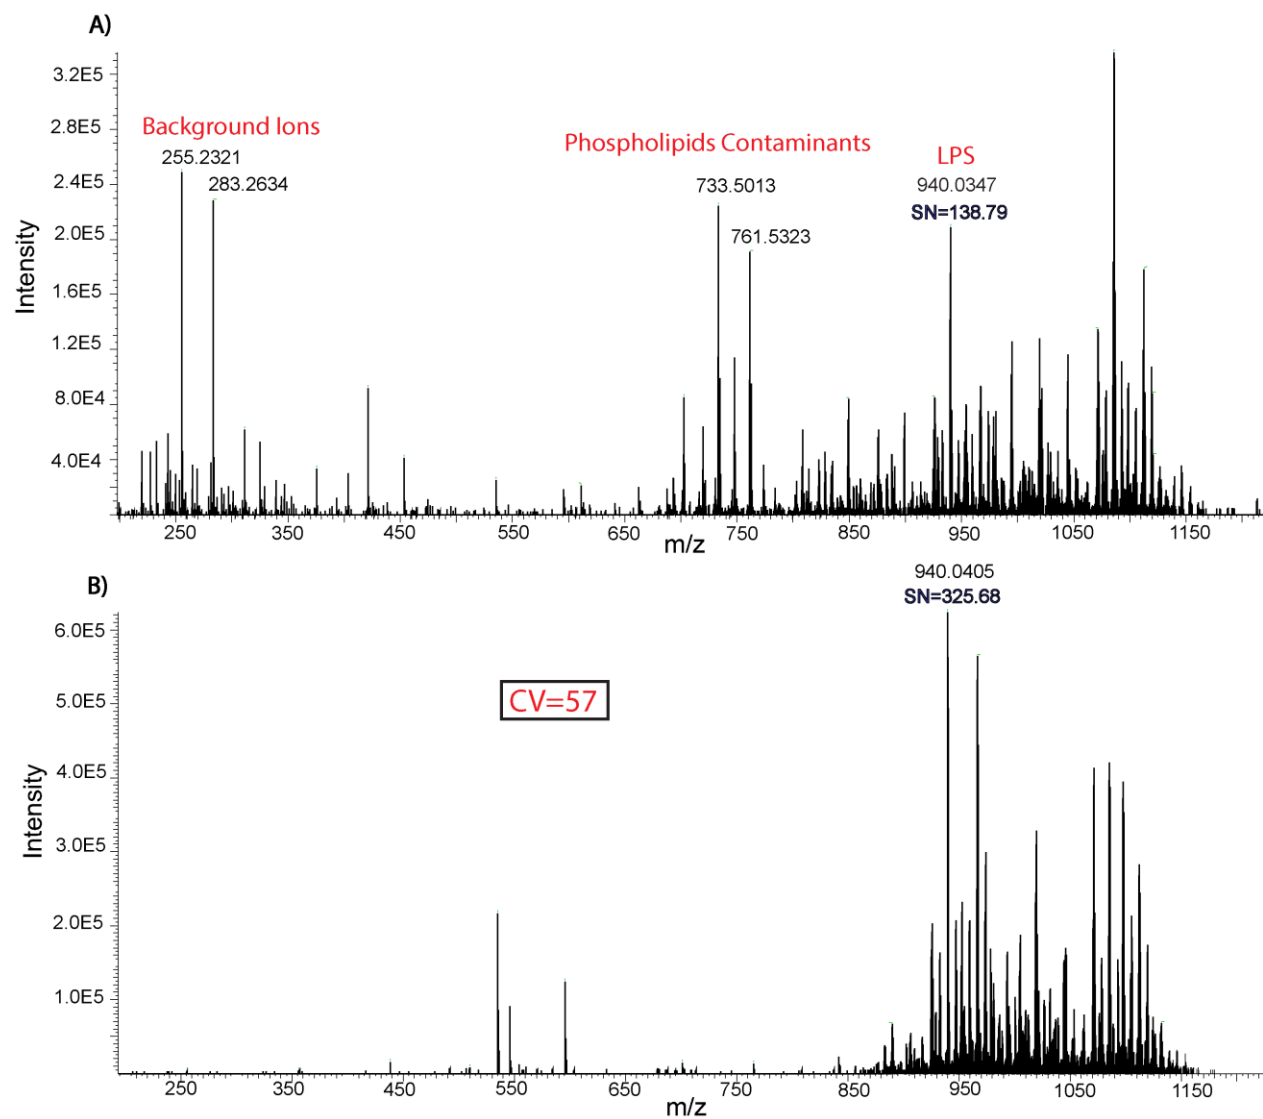

**Figure S1:** **A)** ESI-MS of the J5 *E. coli* LPS (FAIMS off). **B)** Corresponding mass spectrum at  $CV=57$  showing the S/N ratio enhancement of  $m/z$  940.04 ratio by 2.4 fold compared to when the FAIMS voltages were off

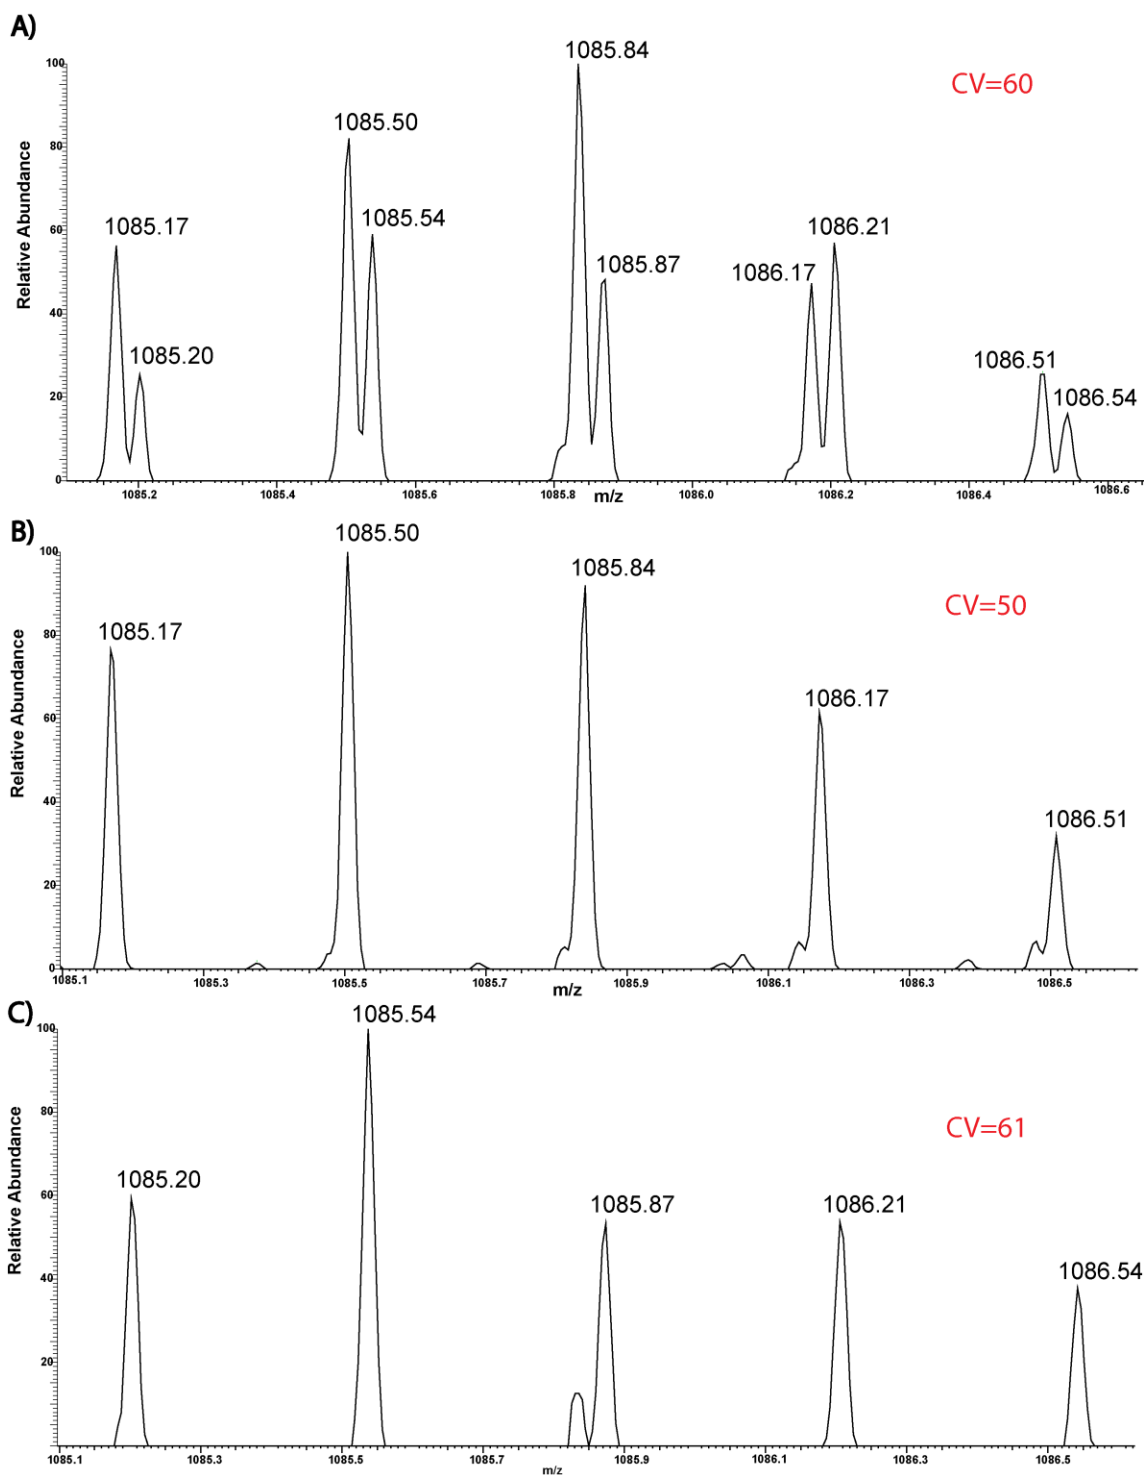

**Figure S2:** Separation of LPS isobaric ion at  $m/z$  1085. **a)** Overlapping isobars at  $m/z$  1085.17 and 1085.20 at CV=60 V. **b)** Separated isobar at  $m/z$  1085.17 at CV=50 V. **c)** Separated isobar at  $m/z$  1085.20 at CV= 61V.

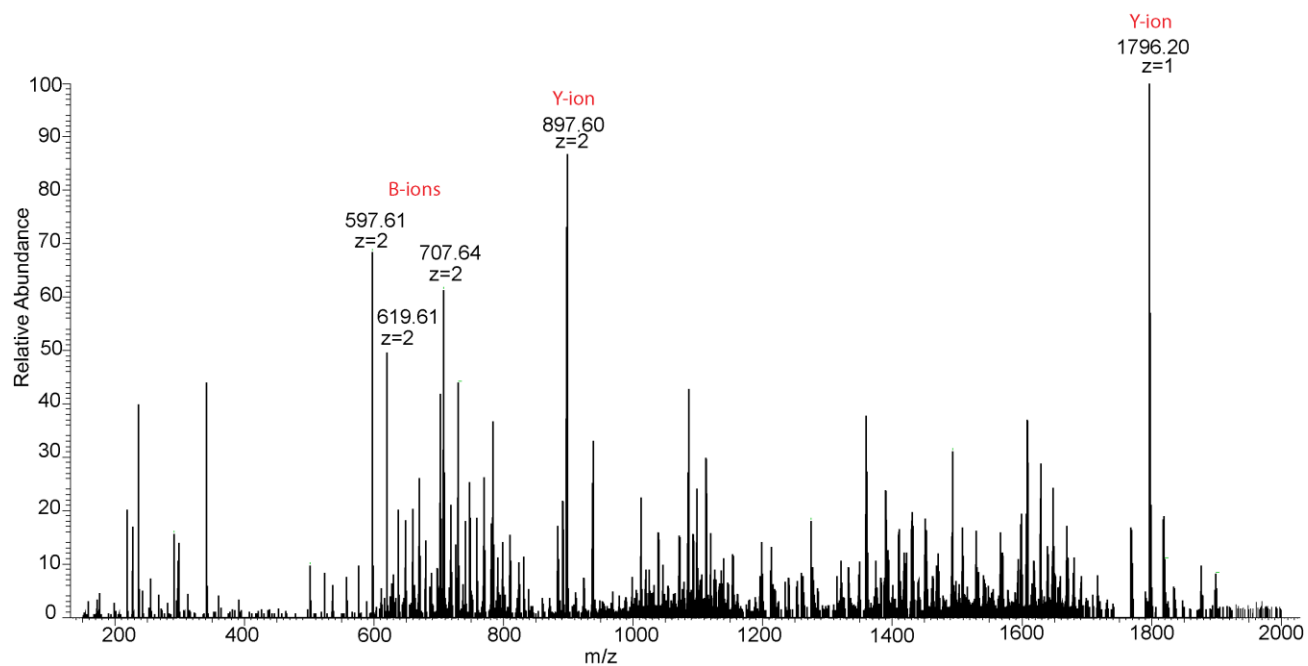

**Figure S3:** Source induced dissociation (SID) of *E. coli* J5 LPS. Fragmentation of the LOS ions in the source were accomplished by applying an energy of 100 V producing  $m/z$  597.61 corresponding to the major oligosaccharide fragment of  $m/z$  1085.17.

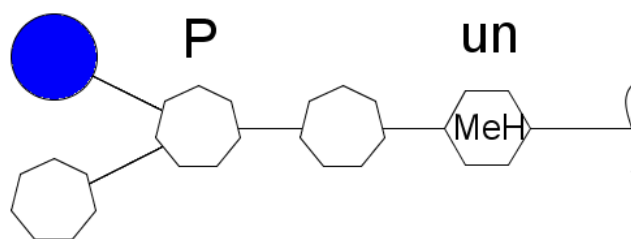

$m/z$ : 993.2720 [MONO,Und,-H,0,freeEnd]

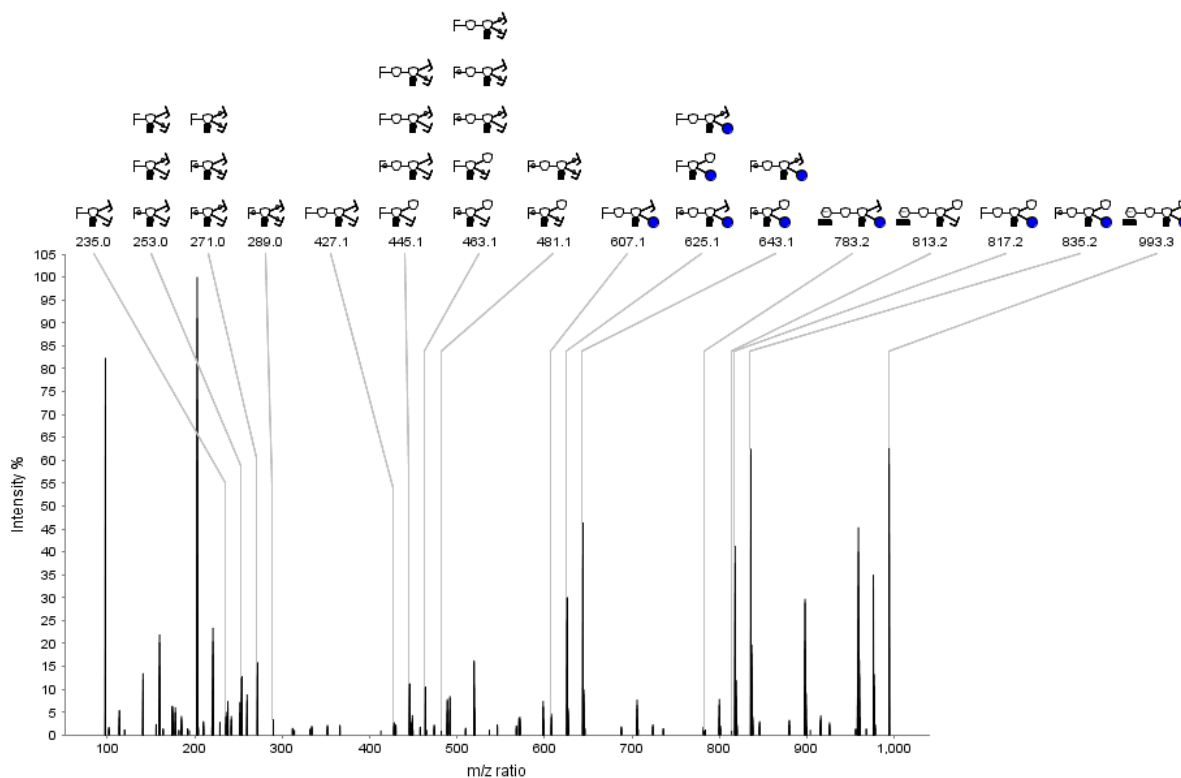

**Figure S4:** Annotated pseudo MS<sup>3</sup> of  $m/z$  597.61 ( $Z = -2$ ) generated using the GlycoWork bench software showing product ions originating from the singly charged key ion at  $m/z$  993.26. The [Kdo-H<sub>2</sub>O-CO<sub>2</sub>] or C<sub>7</sub>H<sub>10</sub>O<sub>4</sub> residue in  $m/z$  993.26 is represented in the software by an unsaturated methyl hexose residue [C<sub>7</sub>H<sub>12</sub>O<sub>5</sub>-H<sub>2</sub>O = C<sub>7</sub>H<sub>10</sub>O<sub>4</sub>]

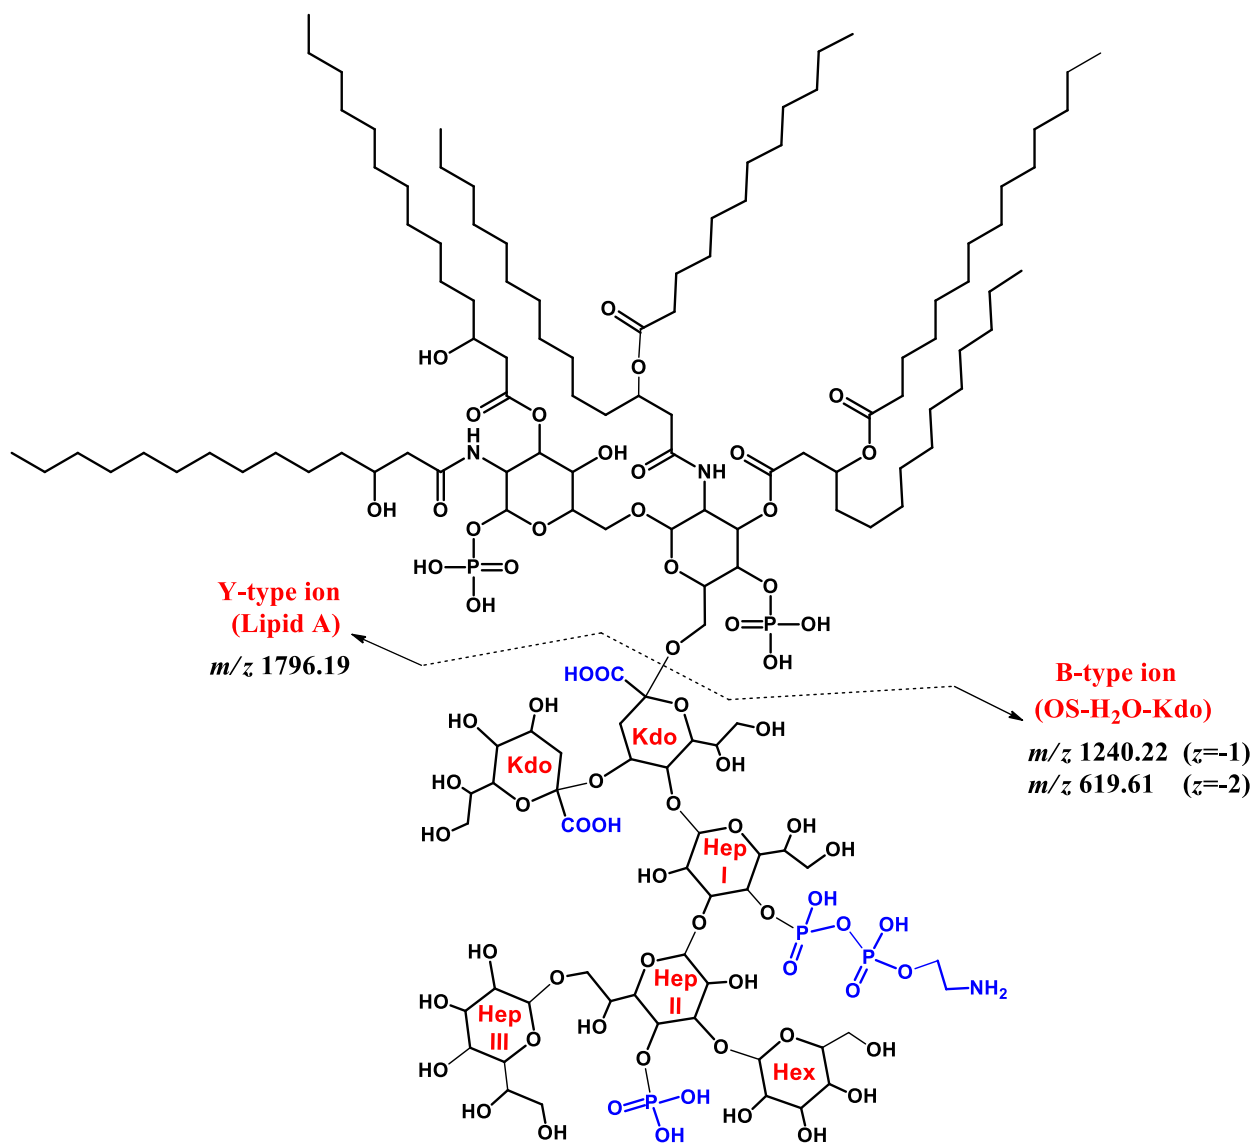

**Figure S5:** Proposed structure of the isobar at  $m/z$  1085.17 showing the lipid A and oligosaccharide compositions. It also shows how the Y-type (Lipid A) and B-type (Oligosaccharides) ions/fragments are formed during the source induced dissociation of 100 V.

**Table S1:** List of all product ions originating from the singly charged key ion at  $m/z$  993.26. Annotation was created using the GlycoWork bench software and all assignments were within 10 ppm

| Mass to charge | Intensity  | Relative Intensity | Ion                                                                                 | Type | Score  | Accuracy | Accuracy PPM | Ion $m/z$ | Charges | Neutral Exchanges |
|----------------|------------|--------------------|-------------------------------------------------------------------------------------|------|--------|----------|--------------|-----------|---------|-------------------|
| 993.2628       | 53741.3448 | 62.7753            | 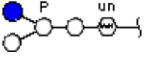   |      | 0.0000 | 0.0092   | 9.2443       | 993.2720  | -H      | 0                 |
| 835.2069       | 53516.4789 | 62.5127            |    | C    | 0.0000 | 0.0057   | 6.7826       | 835.2126  | -H      | 0                 |
| 817.1986       | 35348.8035 | 41.2910            |    | B    | 0.0000 | 0.0034   | 4.1424       | 817.2020  | -H      | 0                 |
| 813.2030       | 944.6947   | 1.1035             |    | Z    | 0.0000 | 0.0057   | 7.0290       | 813.2087  | -H      | 0                 |
| 783.1923       | 1047.6561  | 1.2238             |    | Z    | 0.0000 | 0.0058   | 7.4242       | 783.1981  | -H      | 0                 |
| 643.1459       | 39730.1194 | 46.4088            |   | C    | 0.0000 | 0.0033   | 5.1001       | 643.1492  | -H      | 0                 |
| 643.1459       | 39730.1194 | 46.4088            |  | CY   | 0.0000 | 0.0033   | 5.1001       | 643.1492  | -H      | 0                 |
| 625.1350       | 25702.5073 | 30.0231            |  | B    | 0.0000 | 0.0036   | 5.8216       | 625.1386  | -H      | 0                 |
| 625.1350       | 25702.5073 | 30.0231            |  | CZ   | 0.0000 | 0.0036   | 5.8216       | 625.1386  | -H      | 0                 |
| 625.1350       | 25702.5073 | 30.0231            |  | BY   | 0.0000 | 0.0036   | 5.8216       | 625.1386  | -H      | 0                 |

| Mass to charge | Intensity | Relative Intensity | Ion                                                                                 | Type | Score  | Accuracy | Accuracy PPM | Ion m/z  | Charges | Neutral Exchanges |
|----------------|-----------|--------------------|-------------------------------------------------------------------------------------|------|--------|----------|--------------|----------|---------|-------------------|
| 607.1246       | 4008.8580 | 4.6828             | 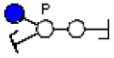   | BZ   | 0.0000 | 0.0035   | 5.7654       | 607.1281 | -H      | 0                 |
| 481.0937       | 959.7565  | 1.1211             |    | CY   | 0.0000 | 0.0027   | 5.5632       | 481.0964 | -H      | 0                 |
| 481.0937       | 959.7565  | 1.1211             |    | CYY  | 0.0000 | 0.0027   | 5.5632       | 481.0964 | -H      | 0                 |
| 463.0828       | 9004.8476 | 10.5186            |    | CZ   | 0.0000 | 0.0031   | 6.6023       | 463.0858 | -H      | 0                 |
| 463.0828       | 9004.8476 | 10.5186            |    | BY   | 0.0000 | 0.0031   | 6.6023       | 463.0858 | -H      | 0                 |
| 463.0828       | 9004.8476 | 10.5186            |    | CYZ  | 0.0000 | 0.0031   | 6.6023       | 463.0858 | -H      | 0                 |
| 463.0828       | 9004.8476 | 10.5186            |    | CZY  | 0.0000 | 0.0031   | 6.6023       | 463.0858 | -H      | 0                 |
| 463.0828       | 9004.8476 | 10.5186            |  | BYY  | 0.0000 | 0.0031   | 6.6023       | 463.0858 | -H      | 0                 |
| 445.0724       | 9604.0290 | 11.2185            |  | BZ   | 0.0000 | 0.0029   | 6.4587       | 445.0753 | -H      | 0                 |
| 445.0724       | 9604.0290 | 11.2185            |  | CZZ  | 0.0000 | 0.0029   | 6.4587       | 445.0753 | -H      | 0                 |
| 445.0724       | 9604.0290 | 11.2185            |  | BYZ  | 0.0000 | 0.0029   | 6.4587       | 445.0753 | -H      | 0                 |
| 445.0724       | 9604.0290 | 11.2185            |  | BZY  | 0.0000 | 0.0029   | 6.4587       | 445.0753 | -H      | 0                 |
| 427.0626       | 2408.4354 | 2.8133             |  | BZZ  | 0.0000 | 0.0021   | 5.0157       | 427.0647 | -H      | 0                 |

| Mass to charge | Intensity  | Relative Intensity | Ion | Type | Score  | Accuracy | Accuracy PPM | Ion m/z  | Charges | Neutral Exchanges |
|----------------|------------|--------------------|-----|------|--------|----------|--------------|----------|---------|-------------------|
| 289.0316       | 2956.8246  | 3.4539             |     | CYY  | 0.0000 | 0.0014   | 4.8562       | 289.0330 | -H      | 0                 |
| 271.0209       | 13544.2466 | 15.8210            |     | CYZ  | 0.0000 | 0.0015   | 5.5391       | 271.0224 | -H      | 0                 |
| 271.0209       | 13544.2466 | 15.8210            |     | CZY  | 0.0000 | 0.0015   | 5.5391       | 271.0224 | -H      | 0                 |
| 271.0209       | 13544.2466 | 15.8210            |     | BYY  | 0.0000 | 0.0015   | 5.5391       | 271.0224 | -H      | 0                 |
| 253.0106       | 11022.3107 | 12.8752            |     | CZZ  | 0.0000 | 0.0013   | 5.0784       | 253.0119 | -H      | 0                 |
| 253.0106       | 11022.3107 | 12.8752            |     | BYZ  | 0.0000 | 0.0013   | 5.0784       | 253.0119 | -H      | 0                 |
| 253.0106       | 11022.3107 | 12.8752            |     | BZY  | 0.0000 | 0.0013   | 5.0784       | 253.0119 | -H      | 0                 |
| 234.9999       | 4348.7691  | 5.0798             |     | BZZ  | 0.0000 | 0.0014   | 5.9868       | 235.0013 | -H      | 0                 |



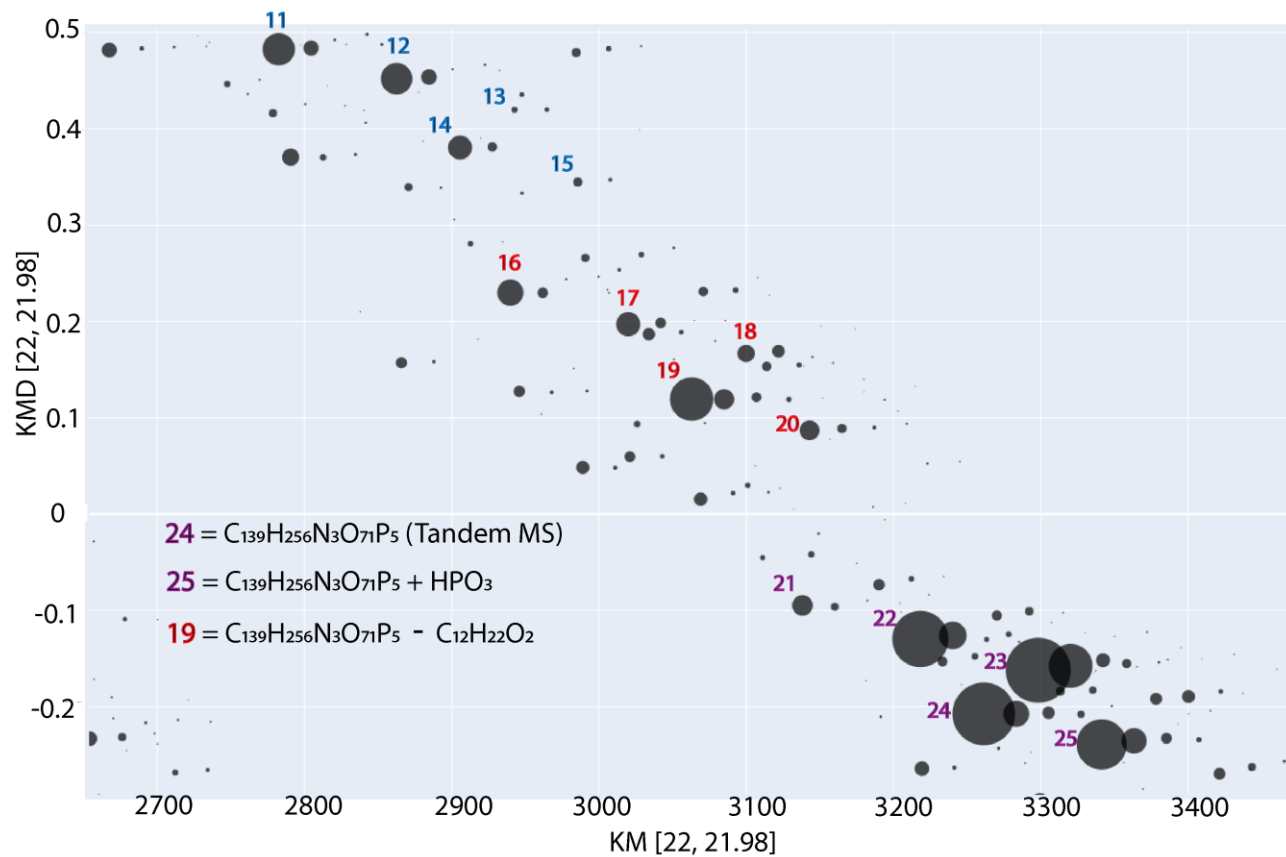

**Figure S6:** KMD plot region showing a constant structural difference of 157.12 Da between ion clusters **11-15** (blue) and **16-20** (red) and a constant structural difference of 198.16 Da between ion clusters **16-20** (red) and **21-25** (purple). Chemical compositions of ions **24**, **25** and **19** are shown on the plot as a representative example for how all the 74 ions compositions were assigned

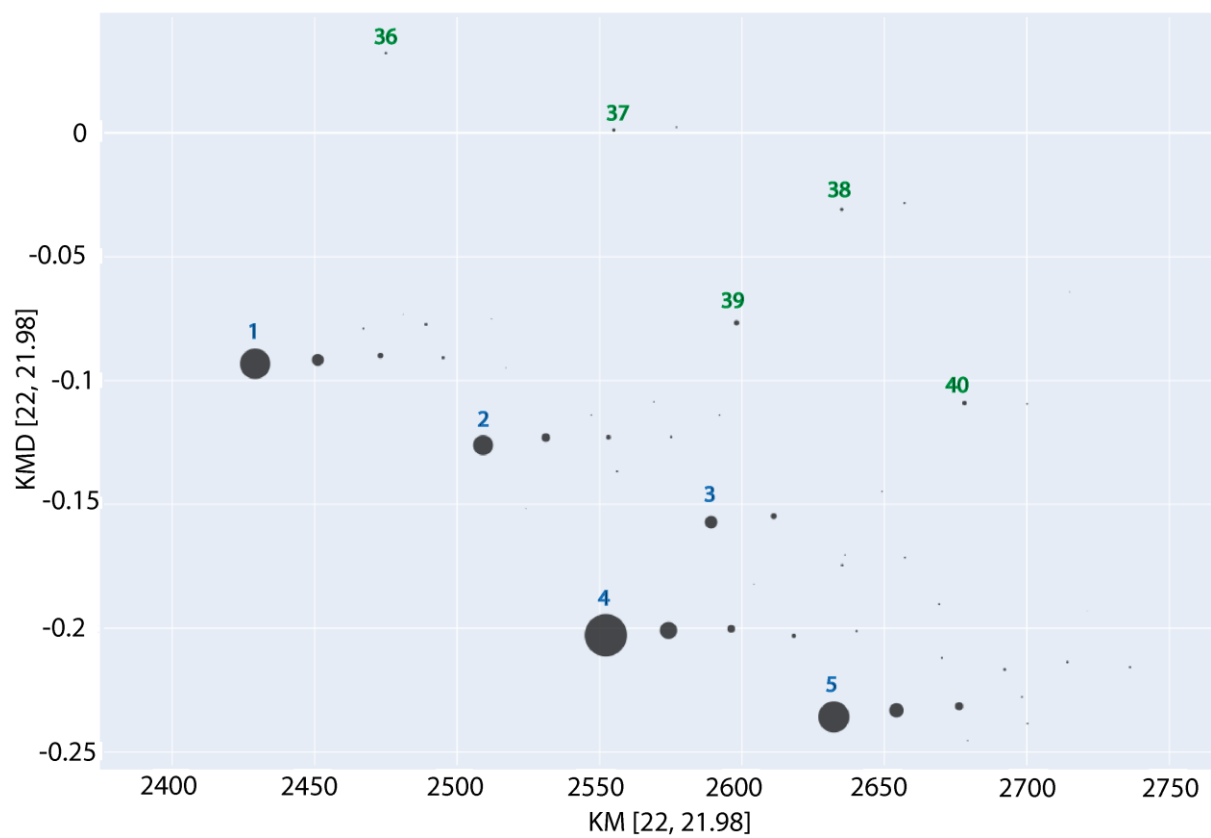

**Figure S7:** KMD plot region showing a constant structural difference of 45.84 Da between ion clusters **1-5** and **36-40** (annotated in blue and green, respectively).

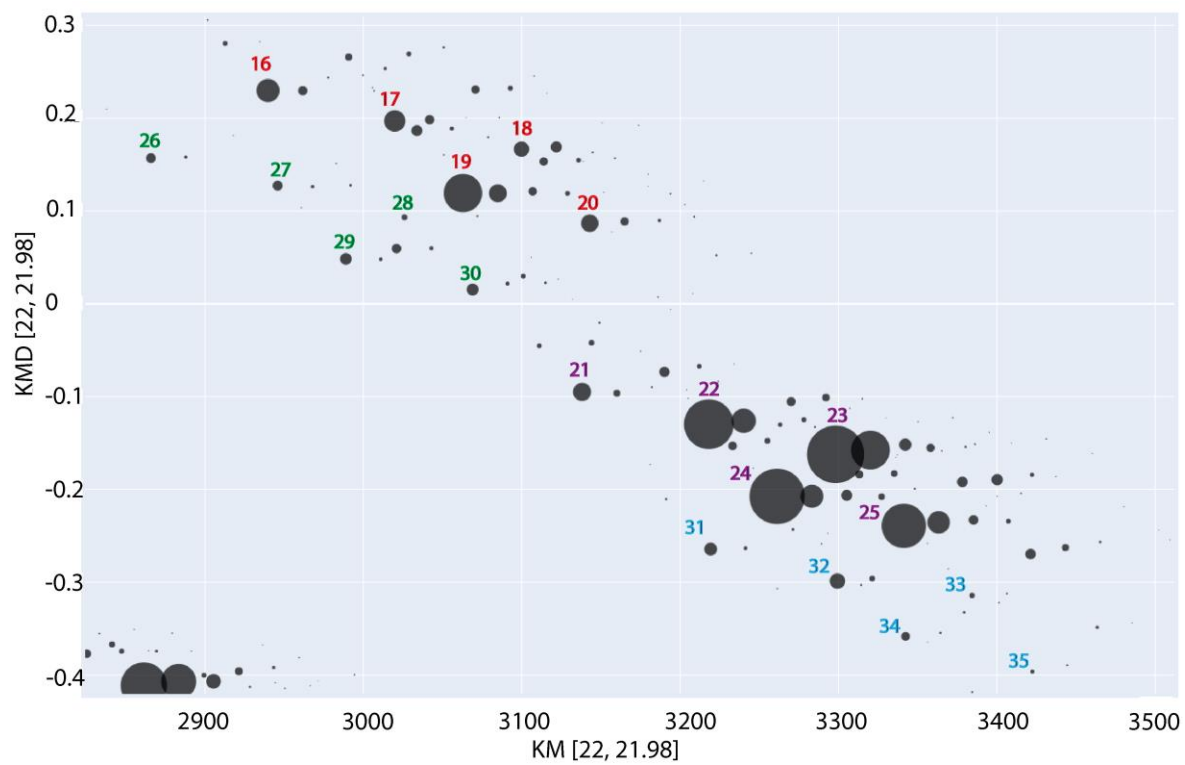

**Figure S8:** KMD plot region showing a constant structural difference of 73.87 Da between ion clusters **16-20** and **26-30** (annotated in red and green, respectively) and a constant structural difference of 81.10 Da between ion clusters **21-25** and **31-35** (annotated in purple and blue, respectively).

**Table S2:** Chemical composition of the *E. coli* J5 LPS (Rc mutant) species revealed from the in-depth KMD plot analysis using the custom base unit of [Na-H]. Abbreviations used are LA: *E. coli* lipid A, Kdo: 3-deoxy- d-manno-oct-2-ulosonic acid, Hep: heptose, Hex: hexose, GlcN: glucosamine, P: phosphate, EN: ethanolamine, 3-hydroxy-tetradecanoic acid: C14:0(3-OH), dodecanoic acid: C12:0, tetradecanoic acid: C14:0

**a) LOS ion species with a complete hexa-acylated lipid A**

|    | Molecular weight (Da) | Chemical Composition                                          | Chemical Formula                                                                | Error (ppm) | Sodiated Forms                        |
|----|-----------------------|---------------------------------------------------------------|---------------------------------------------------------------------------------|-------------|---------------------------------------|
| 1  | 2863.491              | LA+ Kdo2+ Hep2+ Hex+ P                                        | C <sub>130</sub> H <sub>237</sub> N <sub>2</sub> O <sub>59</sub> P <sub>3</sub> | 3.2         | 2885.4718                             |
| 2  | 2943.455              | LA+ Kdo2+ Hep2+ Hex+ P2                                       | C <sub>130</sub> H <sub>238</sub> N <sub>2</sub> O <sub>62</sub> P <sub>4</sub> | 2.3         | 2965.438                              |
| 3  | 2986.4986             | LA+ Kdo2+ Hep2+ Hex+ P2+ EN                                   | C <sub>132</sub> H <sub>243</sub> N <sub>3</sub> O <sub>62</sub> P <sub>4</sub> | 2.7         | 3008.4809                             |
| 4  | 3023.4233             | LA+ Kdo2+ Hep2+ Hex+ P3                                       | C <sub>130</sub> H <sub>239</sub> N <sub>2</sub> O <sub>65</sub> P <sub>5</sub> | 2.9         | 3045.4008                             |
| 5  | 3066.4659             | LA+ Kdo2+ Hep2+ Hex+ P3+ EN                                   | C <sub>132</sub> H <sub>244</sub> N <sub>3</sub> O <sub>65</sub> P <sub>5</sub> | 3.0         | 3088.4415                             |
| 6  | 3108.492              | LA+ Kdo2+ Hep2+ Hex+ P3+ EN+ [C <sub>3</sub> H <sub>6</sub> ] | C <sub>135</sub> H <sub>250</sub> N <sub>3</sub> O <sub>65</sub> P <sub>5</sub> | -3.8        |                                       |
| 7  | 3135.5195             | LA + Kdo2+ Hep3+ Hex+ P2                                      | C <sub>137</sub> H <sub>250</sub> N <sub>2</sub> O <sub>68</sub> P <sub>4</sub> | 2.5         | 3157.5029,<br>3179.4783               |
| 8  | 3146.436              | LA+ Kdo2+ Hep2+ Hex+ P4+ EN                                   | C <sub>132</sub> H <sub>245</sub> N <sub>3</sub> O <sub>68</sub> P <sub>6</sub> | 4.08        |                                       |
| 9  | 3187.4553             | LA (-C <sub>2</sub> H <sub>4</sub> ) + Kdo2+ Hep3+Hex+P3      | C <sub>135</sub> H <sub>247</sub> N <sub>2</sub> O <sub>71</sub> P <sub>5</sub> | 2.7         | 3209.4313,<br>3231.4107               |
| 10 | 3215.4886             | LA + Kdo2+ Hep3+ Hex+ P3                                      | C <sub>137</sub> H <sub>251</sub> N <sub>2</sub> O <sub>71</sub> P <sub>5</sub> | 3.3         | 3237.4669                             |
| 11 | 3216.6223             | LA+ Kdo2+ Hep3+ Hex+ GlcN+ P                                  | C <sub>143</sub> H <sub>260</sub> N <sub>3</sub> O <sub>69</sub> P <sub>3</sub> | 2.5         | 3238.6032                             |
| 12 | 3258.531              | LA + Kdo2+ Hep3+ Hex+ P3+ EN                                  | C <sub>139</sub> H <sub>256</sub> N <sub>3</sub> O <sub>71</sub> P <sub>5</sub> | 3.3         | 3280.5129,<br>3302.4938,<br>3324.4772 |
| 13 | 3267.4216             | LA (-C <sub>2</sub> H <sub>4</sub> ) + Kdo2+ Hep3+Hex+P4      | C <sub>135</sub> H <sub>248</sub> N <sub>2</sub> O <sub>74</sub> P <sub>6</sub> | 2.6         | 3289.399                              |
| 14 | 3295.4554             | LA + Kdo2+ Hep3+ Hex+ P4                                      | C <sub>137</sub> H <sub>252</sub> N <sub>2</sub> O <sub>74</sub> P <sub>6</sub> | 3.4         | 3317.4328,<br>3339.4089               |
| 15 | 3296.5911             | LA+ Kdo2+ Hep3+ Hex+ GlcN+ P2                                 | C <sub>143</sub> H <sub>261</sub> N <sub>3</sub> O <sub>72</sub> P <sub>4</sub> | 3.2         | 3318.5703                             |
| 16 | 3338.4971             | LA + Kdo2+ Hep3+ Hex+ P4+ EN                                  | C <sub>139</sub> H <sub>257</sub> N <sub>3</sub> O <sub>74</sub> P <sub>6</sub> | 3.2         | 3360.4753,<br>3382.4546,<br>3404.438  |

|    |           |                                       |                                                                                 |      |                         |
|----|-----------|---------------------------------------|---------------------------------------------------------------------------------|------|-------------------------|
| 17 | 3339.6153 | LA+ Kdo2+ Hep3+ Hex+ GlcN+ P2+ EN     | C <sub>145</sub> H <sub>266</sub> N <sub>4</sub> O <sub>72</sub> P <sub>4</sub> | -2.2 | 3361.5935               |
| 18 | 3375.4194 | LA + Kdo2+ Hep3+ Hex+ P5              | C <sub>137</sub> H <sub>253</sub> N <sub>2</sub> O <sub>77</sub> P <sub>7</sub> | 2.6  | 3397.399,<br>3419.3757  |
| 19 | 3381.5368 | LA + Kdo2+ Hep3+ Hex+ P4+ EN2         | C <sub>141</sub> H <sub>262</sub> N <sub>4</sub> O <sub>74</sub> P <sub>6</sub> | 2.4  | 3403.5167               |
| 20 | 3381.6409 | LA+ Kdo2+ Hep3+ Hex+ GlcN+ P2+ EN+ Ac | C <sub>147</sub> H <sub>268</sub> N <sub>4</sub> O <sub>73</sub> P <sub>4</sub> | 2.3  |                         |
| 21 | 3418.4618 | LA + Kdo2+ Hep3+ Hex+ P5+ EN          | C <sub>139</sub> H <sub>258</sub> N <sub>3</sub> O <sub>77</sub> P <sub>7</sub> | 2.6  | 3440.4367,<br>3462.4128 |
| 22 | 3419.5876 | LA+ Kdo2+ Hep3+ Hex+ GlcN+ P3+ EN     | C <sub>145</sub> H <sub>267</sub> N <sub>4</sub> O <sub>75</sub> P <sub>5</sub> | -0.4 | 3441.5628               |
| 23 | 3461.6094 | LA+ Kdo2+ Hep3+ Hex+ GlcN+ P3+ EN+ Ac | C <sub>147</sub> H <sub>269</sub> N <sub>4</sub> O <sub>76</sub> P <sub>5</sub> | 2.8  |                         |

**b) LOS ion species with penta-acylated lipid A**

|    | Molecular weight (Da) | Chemical Composition                                                         | Chemical Formula                                                                | Error (ppm) | Sodiated forms                       |
|----|-----------------------|------------------------------------------------------------------------------|---------------------------------------------------------------------------------|-------------|--------------------------------------|
| 1  | 2665.3291             | (LA - C12:0 - O) + Kdo2+ Hep2+ Hex+ P                                        | C <sub>118</sub> H <sub>215</sub> N <sub>2</sub> O <sub>57</sub> P <sub>3</sub> | 3.4         | 2687.3094,<br>2709.2899              |
| 2  | 2745.2986             | (LA - C12:0 - O) + Kdo2+ Hep2+ Hex+ P2                                       | C <sub>118</sub> H <sub>216</sub> N <sub>2</sub> O <sub>60</sub> P <sub>4</sub> | 4.5         | 2767.2762                            |
| 3  | 2776.3035             | (LA - C14:0) + Kdo2+ Hep2+ Hex+ P2+ EN                                       | C <sub>118</sub> H <sub>217</sub> N <sub>3</sub> O <sub>61</sub> P <sub>4</sub> | 4.1         | 2798.2761                            |
| 4  | 2788.3393             | (LA - C12:0 - O) + Kdo2+ Hep2+ Hex+ P2+ EN                                   | C <sub>120</sub> H <sub>221</sub> N <sub>3</sub> O <sub>60</sub> P <sub>4</sub> | 3.9         | 2810.3214,<br>2832.3003              |
| 5  | 2868.3048             | (LA - C12:0 - O) + Kdo2+ Hep2+ Hex+ P3+ EN                                   | C <sub>120</sub> H <sub>222</sub> N <sub>3</sub> O <sub>63</sub> P <sub>5</sub> | 3.5         | 2890.2872                            |
| 6  | 2910.3289             | (LA - C12:0 - O) + Kdo2+ Hep2+ Hex+ P3+ EN+ [C <sub>3</sub> H <sub>6</sub> ] | C <sub>123</sub> H <sub>228</sub> N <sub>3</sub> O <sub>63</sub> P <sub>5</sub> | -4.4        | 2932.3091                            |
| 7  | 2937.3575             | (LA - C12:0 - O) + Kdo2+ Hep3+ Hex+ P2                                       | C <sub>125</sub> H <sub>228</sub> N <sub>2</sub> O <sub>66</sub> P <sub>4</sub> | 2.6         | 2959.3396                            |
| 8  | 3017.3246             | (LA - C12:0 - O) + Kdo2+ Hep3+ Hex+ P3                                       | C <sub>125</sub> H <sub>229</sub> N <sub>2</sub> O <sub>69</sub> P <sub>5</sub> | 2.8         | 3039.3052                            |
| 9  | 3018.4612             | (LA - C12:0 - O) + Kdo2+ Hep3+ Hex+ GlcN+ P                                  | C <sub>131</sub> H <sub>238</sub> N <sub>3</sub> O <sub>67</sub> P <sub>3</sub> | 3.0         | 3040.4428                            |
| 10 | 3060.367              | (LA - C12:0 - O) + Kdo2+ Hep3+ Hex+ P3+ EN                                   | C <sub>127</sub> H <sub>234</sub> N <sub>3</sub> O <sub>69</sub> P <sub>5</sub> | 2.9         | 3082.3491,<br>3104.329,<br>3126.3131 |
| 11 | 3097.2893             | (LA - C12:0 - O) + Kdo2+ Hep3+ Hex+ P4                                       | C <sub>125</sub> H <sub>230</sub> N <sub>2</sub> O <sub>72</sub> P <sub>6</sub> | 2.2         | 3119.2689                            |
| 12 | 3098.4252             | (LA - C12:0 - O) + Kdo2+ Hep3+ Hex+ GlcN+ P2                                 | C <sub>131</sub> H <sub>239</sub> N <sub>3</sub> O <sub>70</sub> P <sub>4</sub> | 2.2         | 3120.4102                            |

|    |           |                                                  |                                                                                 |     |                                       |
|----|-----------|--------------------------------------------------|---------------------------------------------------------------------------------|-----|---------------------------------------|
| 13 | 3140.3338 | (LA - C12:0 - O) + Kdo2+ Hep3+ Hex+ P4+ EN       | C <sub>127</sub> H <sub>235</sub> N <sub>3</sub> O <sub>72</sub> P <sub>6</sub> | 2.9 | 3162.3138,<br>3184.2947,<br>3206.2727 |
| 14 | 3141.4617 | (LA - C12:0 - O) + Kdo2+ Hep3+ Hex+ GlcN+ P2+ EN | C <sub>133</sub> H <sub>244</sub> N <sub>4</sub> O <sub>70</sub> P <sub>4</sub> | 0.3 |                                       |
| 15 | 3220.3026 | (LA - C12:0 - O) + Kdo2+ Hep3+ Hex+ P5+ EN       | C <sub>127</sub> H <sub>236</sub> N <sub>3</sub> O <sub>75</sub> P <sub>7</sub> | 3.6 | 3242.2824                             |

**c) LOS ion species with tetra-acylated lipid A**

|    | Molecular weight (Da) | Chemical Composition                                  | Chemical Formula                                                                | Error (ppm) | Sodiated forms                                      |
|----|-----------------------|-------------------------------------------------------|---------------------------------------------------------------------------------|-------------|-----------------------------------------------------|
| 1  | 2427.0997             | (LA - C14:0(3-OH) - C14:0)+ Kdo2+ Hep2+ Hex+ P        | C <sub>102</sub> H <sub>185</sub> N <sub>2</sub> O <sub>56</sub> P <sub>3</sub> | 3.9         | 2449.0801,<br>2471.0603,<br>2493.0431               |
| 2  | 2507.0669             | (LA - C14:0(3-OH) - C14:0)+ Kdo2+ Hep2+ Hex+ P2       | C <sub>102</sub> H <sub>186</sub> N <sub>2</sub> O <sub>59</sub> P <sub>4</sub> | 4.1         | 2529.0458,<br>2551.0276,<br>2573.0094               |
| 3  | 2550.1083             | (LA - C14:0(3-OH) - C14:0)+ Kdo2+ Hep2+ Hex+ P2+ EN   | C <sub>104</sub> H <sub>191</sub> N <sub>3</sub> O <sub>59</sub> P <sub>4</sub> | 3.7         | 2572.0883,<br>2594.0696,<br>2616.0544,<br>2638.0344 |
| 4  | 2587.0323             | (LA - C14:0(3-OH) - C14:0) + Kdo2+ Hep2+ Hex+ P3      | C <sub>102</sub> H <sub>187</sub> N <sub>2</sub> O <sub>62</sub> P <sub>5</sub> | 3.6         | 2609.0118                                           |
| 5  | 2630.0756             | (LA - C14:0(3-OH) - C14:0) + Kdo2+ Hep2+ Hex+ P3+ EN  | C <sub>104</sub> H <sub>192</sub> N <sub>3</sub> O <sub>62</sub> P <sub>5</sub> | 4.0         | 2652.0549,<br>2674.0352,<br>2696.0134,<br>2717.9967 |
| 6  | 2666.9997             | (LA - C14:0(3-OH) - C14:0) + Kdo2+ Hep2+ Hex+ P4      | C <sub>102</sub> H <sub>188</sub> N <sub>2</sub> O <sub>65</sub> P <sub>6</sub> | 3.9         |                                                     |
| 7  | 2673.1167             | (LA - C14:0(3-OH) - C14:0) + Kdo2+ Hep2+ Hex+ P3+ EN2 | C <sub>106</sub> H <sub>197</sub> N <sub>4</sub> O <sub>62</sub> P <sub>5</sub> | 3.5         | 2695.0965,<br>2717.0761                             |
| 8  | 2699.1303             | (LA - C14:0(3-OH) - C14:0)+ Kdo2+ Hep3+ Hex+ P2       | C <sub>109</sub> H <sub>198</sub> N <sub>2</sub> O <sub>65</sub> P <sub>4</sub> | 3.8         | 2721.1101,<br>2743.0912,<br>2765.0741,<br>2787.0531 |
| 9  | 2710.0424             | (LA- C14:0(3-OH) - C14:0) + Kdo2+ Hep2+ Hex+ P4+ EN   | C <sub>104</sub> H <sub>193</sub> N <sub>3</sub> O <sub>65</sub> P <sub>6</sub> | 4.0         | 2732.0217                                           |
| 10 | 2753.083              | (LA - C14:0(3-OH) - C14:0)+ Kdo2+ Hep2+ Hex+ P4+ EN2  | C <sub>106</sub> H <sub>198</sub> N <sub>4</sub> O <sub>65</sub> P <sub>6</sub> | 3.3         | 2775.0616,<br>2797.0381                             |
| 11 | 2779.0984             | (LA - C14:0(3-OH) - C14:0)+ Kdo2+ Hep3+ Hex+ P3       | C <sub>109</sub> H <sub>199</sub> N <sub>2</sub> O <sub>68</sub> P <sub>5</sub> | 4.3         | 2801.077,<br>2823.0583,<br>2845.0376,               |

|    |           |                                                                    |                                                                                 |       |                                                                               |
|----|-----------|--------------------------------------------------------------------|---------------------------------------------------------------------------------|-------|-------------------------------------------------------------------------------|
|    |           |                                                                    |                                                                                 |       | 2867.0194                                                                     |
| 12 | 2780.2339 | (LA - C14:0(3-OH) - C14:0) + Kdo2+<br>Hep3+ Hex+ GlcN+ P           | C <sub>115</sub> H <sub>208</sub> N <sub>3</sub> O <sub>66</sub> P <sub>3</sub> | 4.1   | 2802.2146                                                                     |
| 13 | 2822.1404 | (LA - C14:0(3-OH) - C14:0)+ Kdo2+<br>Hep3+ Hex+ P3+ EN             | C <sub>111</sub> H <sub>204</sub> N <sub>3</sub> O <sub>68</sub> P <sub>5</sub> | 4.2   | 2844.1206,<br>2866.1015,<br>2888.0858                                         |
| 14 | 2859.063  | (LA - C14:0(3-OH) - C14:0)+ Kdo2+<br>Hep3+ Hex+ P4                 | C <sub>109</sub> H <sub>200</sub> N <sub>2</sub> O <sub>71</sub> P <sub>6</sub> | 3.6   | 2881.0406,<br>2903.0224                                                       |
| 15 | 2860.1988 | (LA - C14:0(3-OH) - C14:0)+ Kdo2+<br>Hep3+ Hex+ GlcN+ P2           | C <sub>115</sub> H <sub>209</sub> N <sub>3</sub> O <sub>69</sub> P <sub>4</sub> | 3.5   | 2882.179                                                                      |
| 16 | 2902.1054 | (LA - C14:0(3-OH) - C14:0)+ Kdo2+<br>Hep3+ Hex+ P4+ EN             | C <sub>111</sub> H <sub>205</sub> N <sub>3</sub> O <sub>71</sub> P <sub>6</sub> | 3.6   | 2924.084,<br>2946.0642,<br>2968.0464,<br>2990.028,<br>3012.0138,<br>3033.9932 |
| 17 | 2903.2349 | (LA - C14:0(3-OH) - C14:0)+ Kdo2+<br>Hep3+ Hex+ GlcN+ P2+ EN       | C <sub>117</sub> H <sub>214</sub> N <sub>4</sub> O <sub>69</sub> P <sub>4</sub> | 1.3   | 2925.2162                                                                     |
| 18 | 2939.028  | (LA - C14:0(3-OH) - C14:0) + Kdo2+<br>Hep3+ Hex+ P5                | C <sub>109</sub> H <sub>201</sub> N <sub>2</sub> O <sub>74</sub> P <sub>7</sub> | 3.0   | 2961.0041                                                                     |
| 19 | 2940.1653 | (LA - C14:0(3-OH) - C14:0) +Kdo2+<br>Hep3+ Hex+ GlcN+ P3           | C <sub>115</sub> H <sub>210</sub> N <sub>3</sub> O <sub>72</sub> P <sub>5</sub> | 3.4   | 2962.1471                                                                     |
| 20 | 2945.2477 | (LA - C14:0(3-OH) - C14:0) + Kdo2+<br>Hep3+ Hex+ GlcN+ P2+ EN+ AC  | C <sub>119</sub> H <sub>216</sub> N <sub>4</sub> O <sub>70</sub> P <sub>4</sub> | 2.1   |                                                                               |
| 21 | 2982.0715 | (LA - C14:0(3-OH) - C14:0) + Kdo2+<br>Hep3+ Hex+ P5+ EN            | C <sub>111</sub> H <sub>206</sub> N <sub>3</sub> O <sub>74</sub> P <sub>7</sub> | 3.4   | 3004.0495,<br>3026.0287                                                       |
| 22 | 2983.205  | (LA - C14:0(3-OH) - C14:0) + Kdo2+<br>Hep3+ Hex+ GlcN+ P3+ EN      | C <sub>117</sub> H <sub>215</sub> N <sub>4</sub> O <sub>72</sub> P <sub>5</sub> | 2.5   | 3005.1845                                                                     |
| 23 | 2988.2797 | (LA - C14:0(3-OH) - C14:0) + Kdo2+<br>Hep3+ Hex+ GlcN+ P2+ EN2+ AC | C <sub>121</sub> H <sub>221</sub> N <sub>5</sub> O <sub>70</sub> P <sub>4</sub> | -1.4  |                                                                               |
| 24 | 3026.245  | (LA - C14:0(3-OH) - C14:0)+ Kdo2+<br>Hep3+ Hex+ GlcN+ P3+ EN2      | C <sub>119</sub> H <sub>220</sub> N <sub>5</sub> O <sub>72</sub> P <sub>5</sub> | 1.8   | 3048.2200                                                                     |
| 25 | 3031.3235 | (LA - C14:0(3-OH) - C14:0) + Kdo2+<br>Hep3+ Hex+ GlcN+ P2+ EN3+ AC | C <sub>123</sub> H <sub>226</sub> N <sub>6</sub> O <sub>70</sub> P <sub>4</sub> | -0.8  | 3053.3033                                                                     |
| 26 | 3068.2489 | (LA - C14:0(3-OH) - C14:0) + Kdo2+<br>Hep3+ Hex+ GlcN+ P3+ EN2+ AC | C <sub>121</sub> H <sub>222</sub> N <sub>5</sub> O <sub>73</sub> P <sub>5</sub> | -0.4  | 3090.2294                                                                     |
| 27 | 3111.2912 | (LA - C14:0(3-OH) - C14:0)+ Kdo2+<br>Hep3+ Hex+ GlcN+ P3+ EN3+ AC  | C <sub>123</sub> H <sub>227</sub> N <sub>6</sub> O <sub>73</sub> P <sub>5</sub> | -0.36 | 3133.2716                                                                     |

**d) LOS ion species with tri-acylated lipid A**

|   | Molecular weight (Da) | Chemical Composition                                         | Chemical Formula                                                               | Error (ppm) | Sodiated forms |
|---|-----------------------|--------------------------------------------------------------|--------------------------------------------------------------------------------|-------------|----------------|
| 1 | 2323.9143             | (LA - 2 x C14:0(3-OH) - C14:0) + Kdo2+ Hep2+ Hex+ P2+ EN     | C <sub>90</sub> H <sub>165</sub> N <sub>3</sub> O <sub>57</sub> P <sub>4</sub> | 3.8         | 2345.8944      |
| 2 | 2367.9416             | (LA - C14:0(3-OH) - C14:0 - C12:0) + Kdo2+ Hep2+ Hex+ P2+ EN | C <sub>92</sub> H <sub>169</sub> N <sub>3</sub> O <sub>58</sub> P <sub>4</sub> | 4.2         | 2389.9217      |
| 3 | 2403.8815             | (LA - 2 x C14:0(3-OH) - C14:0) + Kdo2+ Hep2+ Hex+ P3+ EN     | C <sub>90</sub> H <sub>166</sub> N <sub>3</sub> O <sub>60</sub> P <sub>5</sub> | 4.0         | 2425.8609      |
| 4 | 2472.9366             | (LA - 2 x C14:0(3-OH) - C14:0)+ Kdo2+ Hep3+ Hex+ P2          | C <sub>95</sub> H <sub>172</sub> N <sub>2</sub> O <sub>63</sub> P <sub>4</sub> | 4.0         |                |
| 5 | 2552.902              | (LA - 2 x C14:0(3-OH) - C14:0)+ Kdo2+ Hep3+ Hex+ P3          | C <sub>95</sub> H <sub>173</sub> N <sub>2</sub> O <sub>66</sub> P <sub>5</sub> | 3.5         | 2574.8828      |
| 6 | 2595.9445             | (LA - 2 x C14:0(3-OH) - C14:0)+ Kdo2+ Hep3+ Hex+ P3+ EN      | C <sub>97</sub> H <sub>178</sub> N <sub>3</sub> O <sub>66</sub> P <sub>5</sub> | 3.5         | 2617.9248      |
| 7 | 2632.8684             | (LA - 2 x C14:0(3-OH) - C14:0)+ Kdo2+ Hep3+ Hex+ P4          | C <sub>95</sub> H <sub>174</sub> N <sub>2</sub> O <sub>69</sub> P <sub>6</sub> | 3.4         | 2654.8478      |
| 8 | 2675.9112             | (LA - 2 x C14:0(3-OH) - C14:0)+ Kdo2+ Hep3+ Hex+ P4+ EN      | C <sub>97</sub> H <sub>179</sub> N <sub>3</sub> O <sub>69</sub> P <sub>6</sub> | 3.6         | 2697.8935      |
